# Supplementary material
Source: bioRxiv or medRxiv preprint supplement (https://www.biorxiv.org/highwire/filestream/6591/field_highwire_adjunct_files/2/024869-11.pdf)

NW\_004080169.1:116379544..116510424 Ovis aries breed Texel chromosome 6 genomic scaffold, Oar\_v3.1 OAR6, whole genome shotgun sequence

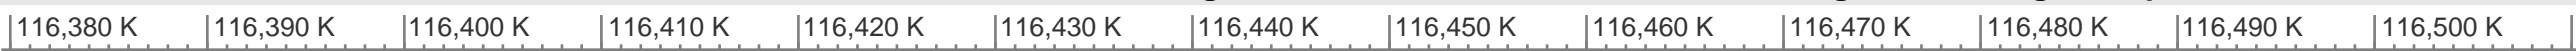

Sequence

Tiling Path (Components)

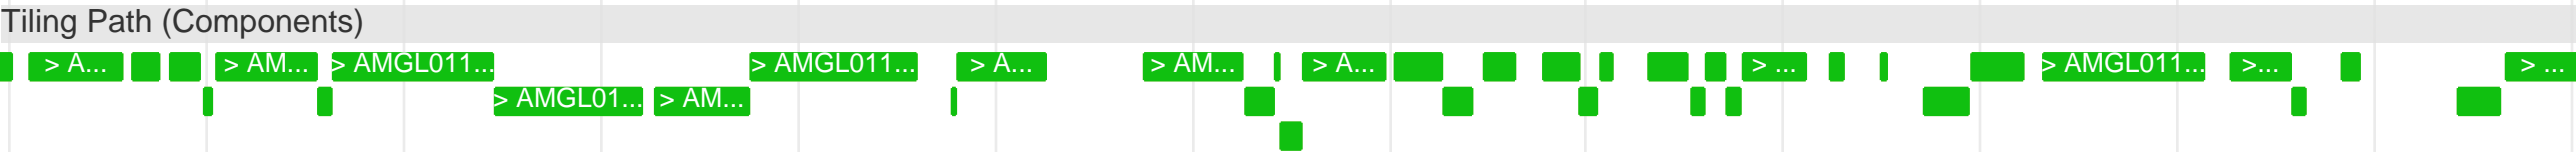

Genes

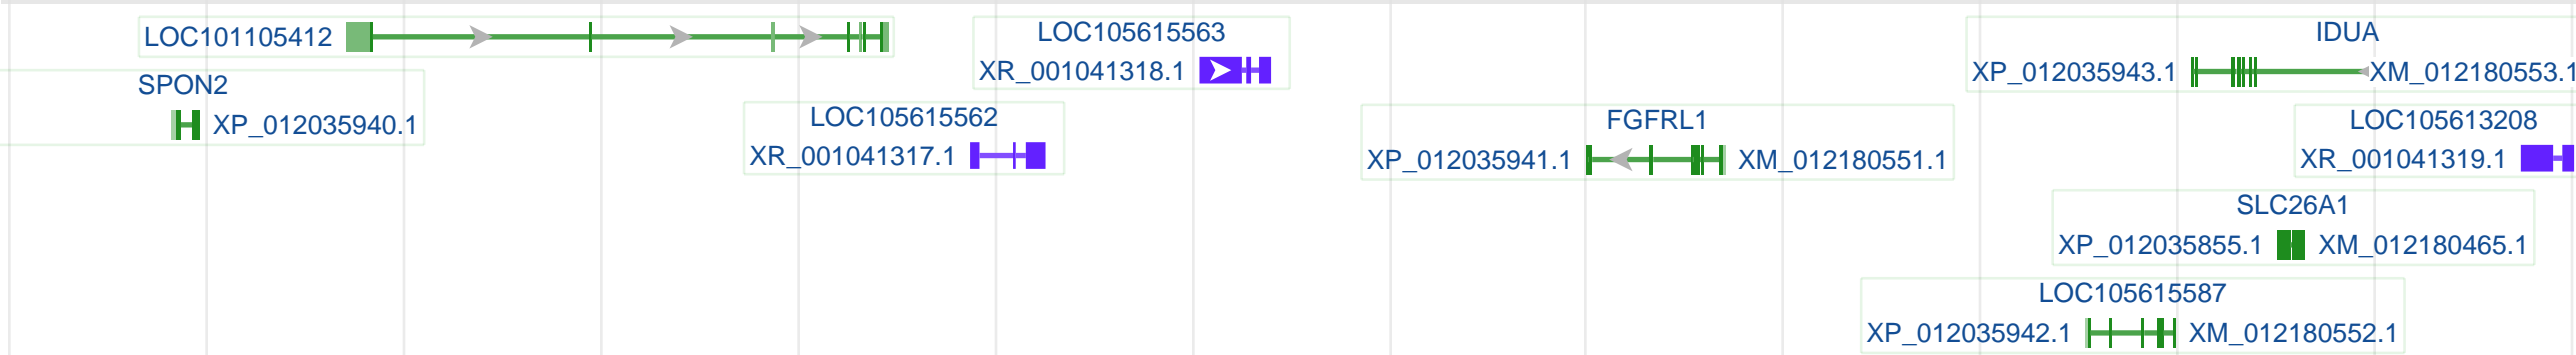

Cleaned Alignments - BLAST Results for: ref|XM\_012167676.1| (3314 letters)

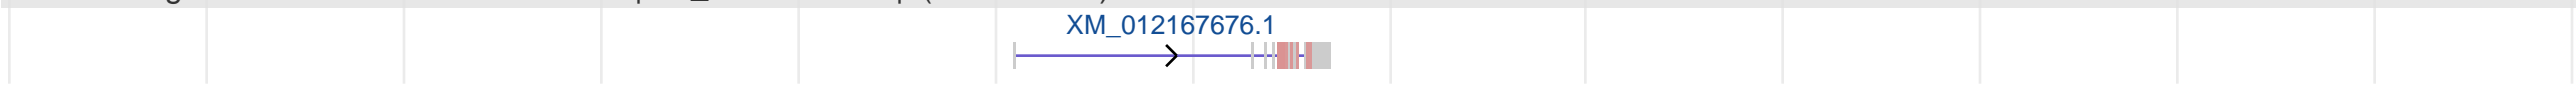

Supplement: Supplementary file [file 024869-11.pdf]
